# Supplementary material
Source: PubMed Central journal article supplement (PMC6081261)
Supplement: NIHMS954555-supplement-Supplementary_Information.pdf [file NIHMS954555-supplement-Supplementary_Information.pdf]

## *Supporting Information*

### **Relative quantitation of neuropeptides at multiple developmental stages of the American lobster using *N*, *N*-dimethyl leucine isobaric tandem mass tags**

**Xiaoyue Jiang<sup>1†</sup>, Feng Xiang<sup>2</sup>, Chenxi Jia<sup>1</sup>, Amanda Rae Buchberger<sup>2</sup>, and Lingjun Li<sup>1,2\*</sup>**

<sup>1</sup>School of Pharmacy, University of Wisconsin-Madison, 777 Highland Avenue, Madison, WI 53705, USA

<sup>2</sup>Department of Chemistry, University of Wisconsin-Madison, 1101 University Avenue, Madison, WI 53706, USA

\* Corresponding author: Dr. Lingjun Li, School of Pharmacy, University of Wisconsin, 777 Highland Avenue, Madison, WI 53705, USA; Phone: 608-265-8491; Fax: 608-262-5345; Email: [lingjun.li@wisc.edu](mailto:lingjun.li@wisc.edu)

†Current address: Cancer Immunology Discovery, Pfizer Inc, 230 E Grand Ave, South San Francisco, CA 94080, USA

Figure S1  
 Supplementary Scheme 1  
 Supplementary Table 1

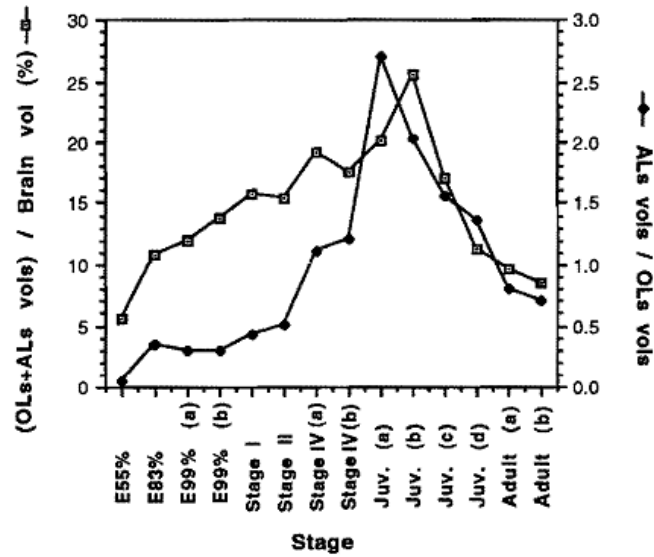

Supplementary Figure S1a

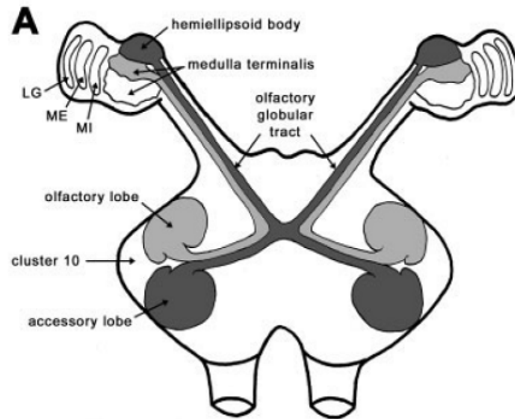

Supplementary Figure S1b

**Figure S1.** (a): Percentage of brain volume occupied by the olfactory (OL) and accessory (AL) lobes and ratio of the OLs and ALs volumes at different developmental stages in *Homarus americanus* (1); (b) morphology of the brain of freshwater crayfish (2).

**Supplementary Scheme 1: DiLeu structures and labeling reactions.**

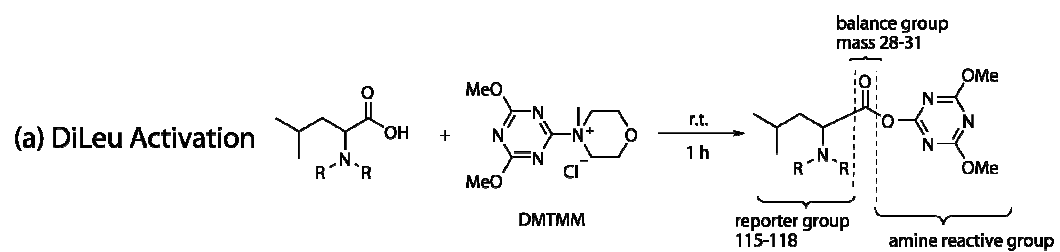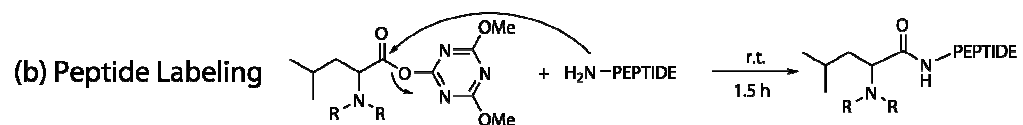

**Supplementary Table 1.** Summary of neuropeptide quantitation and statistical analysis results.

| Peptide Family    | <i>m/z</i> | Sequence          | Embryo  |                    | Larvae  |                    | Juvenile |                    | Adult |          |
|-------------------|------------|-------------------|---------|--------------------|---------|--------------------|----------|--------------------|-------|----------|
|                   |            |                   | Mean    | Standard deviation | Mean    | Standard deviation | Mean     | Standard deviation | Mean  | P value  |
| Tachykinin        | 934.49     | APSGFLGMRamide    | 0.00100 | 0.00031            | 0.00574 | 0.00097            | 0.16968  | 0.04350            | 1     | 1.66E-35 |
|                   | 950.49     | APSGFLGM(O)Ramide | 0.00099 | 0.00035            | 0.00572 | 0.00045            | 0.18008  | 0.05341            | 1     | 8.93E-32 |
|                   | 964.5      | TPSGFLGMRamide    | 0.00104 | 0.00040            | 0.00642 | 0.00145            | 0.17690  | 0.07118            | 1     | 1.28E-25 |
|                   | 980.5      | TPSGFLGM(O)Ramide | 0.00118 | 0.00031            | 0.00654 | 0.00172            | 0.19276  | 0.07721            | 1     | 1.46E-27 |
|                   | 992.5      | APSGFLGMRG        | 0.00510 | 0.00156            | 0.01825 | 0.00701            | 0.24052  | 0.06052            | 1     | 7.50E-30 |
| SIFamide          | 1423.78    | VYRKPPFNGSIFamide | 0.00098 | 0.00020            | 0.00522 | 0.00308            | 0.47657  | 0.05523            | 1     | 8.78E-28 |
| FMRamide          | 1023.55    | GDRNFLRFamide     | 0.00402 | 0.00163            | 0.01108 | 0.00130            | 0.14995  | 0.05313            | 1     | 6.14E-33 |
|                   | 1208.63    | DQNRNFLRFamide    | 0.00408 | 0.00185            | 0.00954 | 0.00370            | 0.17945  | 0.13109            | 1     | 4.60E-20 |
|                   | 1275.72    | DTSTPALRLRFamide  | 0.00418 | 0.00093            | 0.00632 | 0.00141            | 0.13258  | 0.01101            | 1     | 2.52E-34 |
|                   | 1288.68    | QDLDHVFLRFamide   | 0.00619 | 0.00135            | 0.01206 | 0.00196            | 0.15596  | 0.04220            | 1     | 1.57E-33 |
|                   | 1289.64    | GYSRNYLRFamide    | 0.00393 | 0.00071            | 0.00963 | 0.00181            | 0.18171  | 0.03948            | 1     | 1.34E-25 |
|                   | 1337.67    | FSHDRNFLRFamide   | 0.00392 | 0.00110            | 0.00767 | 0.00171            | 0.14776  | 0.04585            | 1     | 3.20E-26 |
| Orcokinin         | 1502.69    | NFDEIDRSFGFV      | 0.00349 | 0.00076            | 0.00566 | 0.00229            | 0.09090  | 0.01917            | 1     | 3.06E-42 |
|                   | 1517.69    | NFDEIDRSFGFV      | 0.00489 | 0.00148            | 0.00662 | 0.00410            | 0.13061  | 0.09439            | 1     | 1.30E-25 |
|                   | 1540.68    | NFDEIDRSFGFV      | 0.00385 | 0.00079            | 0.00726 | 0.00265            | 0.15822  | 0.05434            | 1     | 2.49E-23 |
| Orcokinin related | 1213.53    | FDAFTTGFVGH       | 0.00358 | 0.00108            | 0.00642 | 0.00046            | 0.08940  | 0.01097            | 1     | 8.20E-43 |
|                   | 1280.66    | VYGPDIANLY        | 0.00480 | 0.00130            | 0.00777 | 0.00222            | 0.12734  | 0.01547            | 1     | 2.71E-44 |
| Other             | 1084.62    | HI/LASLYKPR       | 0.00707 | 0.00431            | 0.01446 | 0.00354            | 0.66213  | 0.19281            | 1     | 1.13E-18 |

1. Helluy, S. M., Ruchhoeft, M. L., and Beltz, B. S. (1995) Development of the olfactory and accessory lobes in the American lobster: an allometric analysis and its implications for the deutocerebral structure of decapods, *J Comp Neurol* 357, 433-445.
2. Sullivan, J. M., and Beltz, B. S. (2005) Integration and segregation of inputs to higher-order neuropils of the crayfish brain, *J Comp Neurol* 481, 118-126.
